# Supplementary material
Source: PubMed Central journal article supplement (PMC7416212)
Supplement: 10-1055-s-0040-1712939-s200363.pdf [file 10-1055-s-0040-1712939-s200363.pdf]

**Supplementary Table S1** Demographic characteristics of survey respondents

| Demographics                                | Respondents<br>(n = 36)<br>n (%) |
|---------------------------------------------|----------------------------------|
| <b>Age (y)</b>                              |                                  |
| 25–34                                       | 21 (58.3)                        |
| 35–44                                       | 8 (22.2)                         |
| 45–54                                       | 4 (11.1)                         |
| 55–64                                       | 3 (8.3)                          |
| <b>Gender</b>                               |                                  |
| Female                                      | 32 (88.9)                        |
| Male                                        | 4 (11.1)                         |
| <b>Ethnicity</b>                            |                                  |
| Hispanic or Latino                          | 4 (11.1)                         |
| Non-Hispanic or Latino                      | 29 (80.6)                        |
| Unknown not reported                        | 3 (8.3)                          |
| <b>Race</b>                                 |                                  |
| Asian                                       | 9 (25.0)                         |
| Black or African American                   | 2 (5.5)                          |
| White                                       | 24 (66.7)                        |
| Unknown/not reported                        | 1 (2.8)                          |
| <b>Role</b>                                 |                                  |
| Medical doctor                              | 30 (83.3)                        |
| Registered nurse/nurse practitioner         | 2 (5.5)                          |
| Other <sup>a</sup>                          | 4 (11.1)                         |
| <b>Level of training</b>                    |                                  |
| Resident                                    | 10 (27.8)                        |
| Fellow                                      | 2 (5.5)                          |
| Attending                                   | 18 (50.0)                        |
| N/A                                         | 6 (16.7)                         |
| <b>Years of practice<sup>b</sup></b>        |                                  |
| <1                                          | 4 (11.1)                         |
| 1 and 2                                     | 2 (5.5)                          |
| 3 and 4                                     | 7 (19.4)                         |
| 5 and 10                                    | 10 (27.8)                        |
| 10 and 20                                   | 9 (25.0)                         |
| > 20                                        | 4 (11.1)                         |
| <b>Nature of your obstetrics practice</b>   |                                  |
| General practice                            | 16 (44.4)                        |
| Maternal fetal medicine                     | 9 (25.0)                         |
| Residency                                   | 10 (27.8)                        |
| N/A                                         | 1 (2.8)                          |
| <b>Location of your obstetrics practice</b> |                                  |
| Private practice                            | 6 (16.7)                         |
| Health clinic                               | 6 (16.7)                         |
| Both                                        | 20 (55.6)                        |
| N/A                                         | 4 (11.1)                         |

(Continued)

**Supplementary Table S1** (Continued)

| Demographics                                         | Respondents<br>(n = 36)<br>n (%) |
|------------------------------------------------------|----------------------------------|
| <b>Most common third party payer in the practice</b> |                                  |
| Private insurance                                    | 9 (25.0)                         |
| Medicaid                                             | 24 (66.7)                        |
| Self-pay                                             | 0 (0.0)                          |
| Unsure                                               | 2 (5.5)                          |
| N/A                                                  | 1 (2.8)                          |
| <b>Telehealth use prior to the COVID-19 pandemic</b> |                                  |
| Yes                                                  | 9 (25.0)                         |
| No                                                   | 27 (75.0)                        |

Abbreviations: COVID-19, novel coronavirus disease 2019; N/A, not applicable.

<sup>a</sup>Genetic counselor, certified nurse midwife, nutritionist.

<sup>b</sup>Including postgraduate training for physicians.

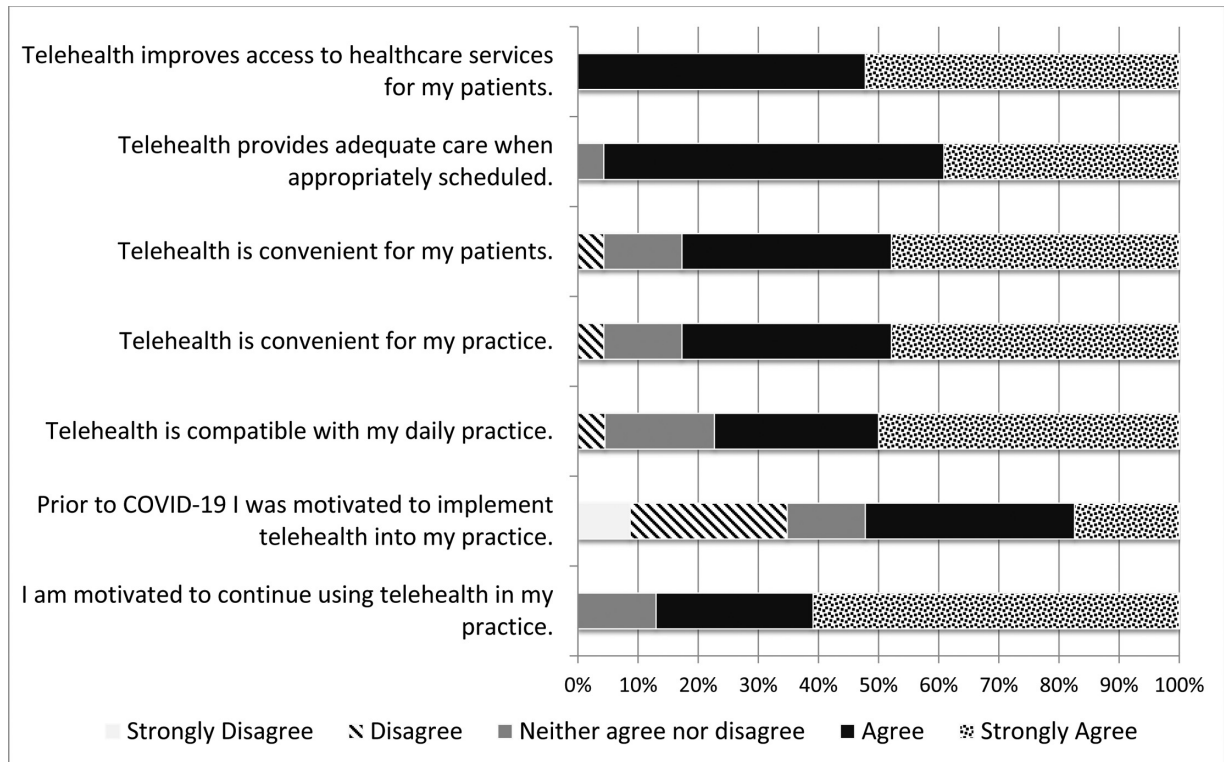

**Supplementary Figure 1.** Health clinic practitioner attitudes and beliefs towards telehealth. The figure demonstrates provider degree of agreement with seven survey statements designed to evaluate attitudes and beliefs to towards the use of telehealth in clinical practice on a 5-point Likert scale.

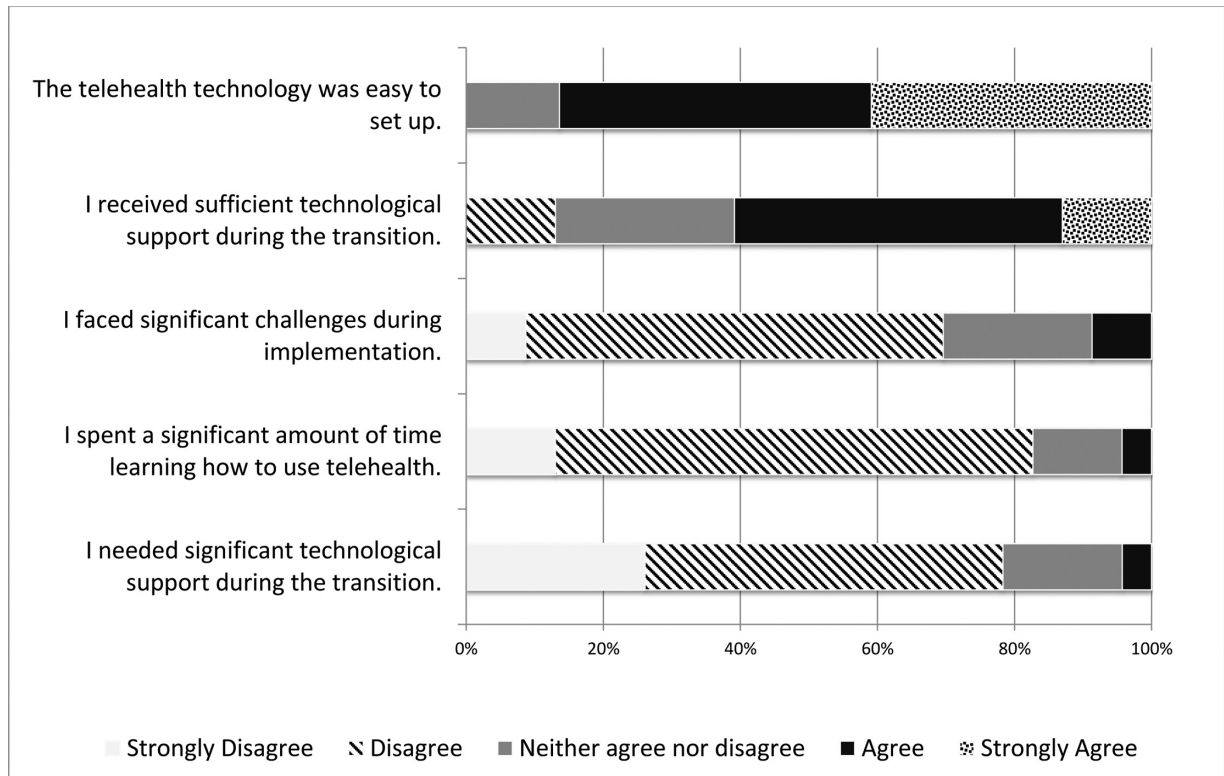

**Supplementary Figure 2.** Health clinic practitioner experience with telehealth implementation. The figure demonstrates provider degree of agreement with five survey statements designed to evaluate practitioner experience with the telehealth implementation process on a 5-point Likert scale.

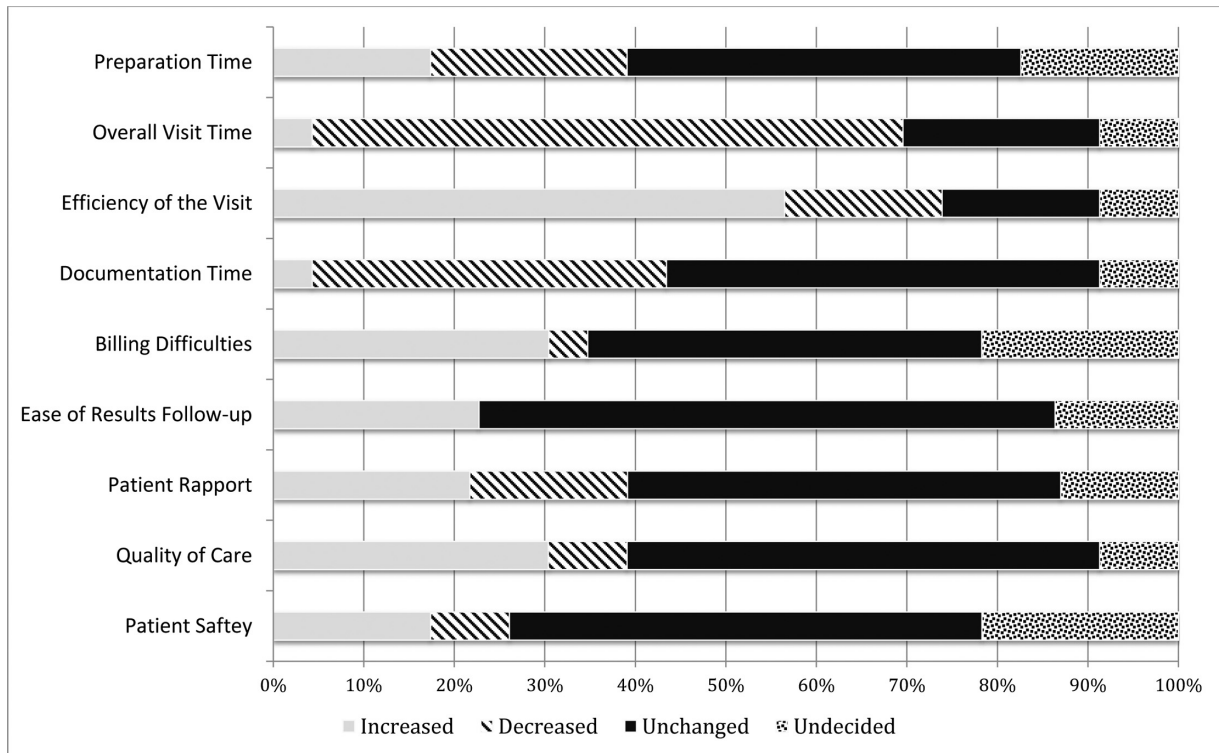

**Supplementary Figure 3.** Health clinic provider perceptions of characteristics of telehealth compared to in-person visits. This figure demonstrates provider perceptions about how telehealth has changed various visit metrics as compared to in-person visits.
